# Supplementary material for: Preparation and purification of mono-ubiquitinated proteins using Avi-tagged ubiquitin
Source: PubMed Central journal article supplement (PMC7039436; doi:10.1371/journal.pone.0229000), 2020-02-24

Figure 1B

Coomassie stain

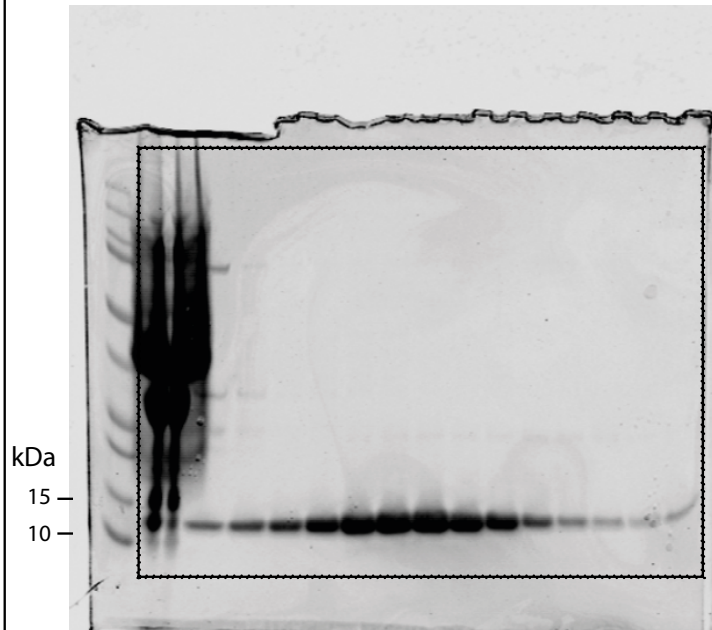

Figure 1C

Coomassie stain

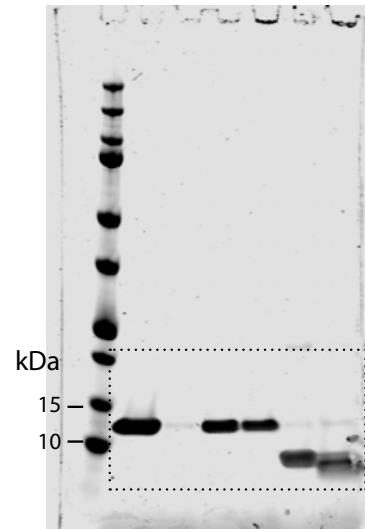

W.B. Streptavidin

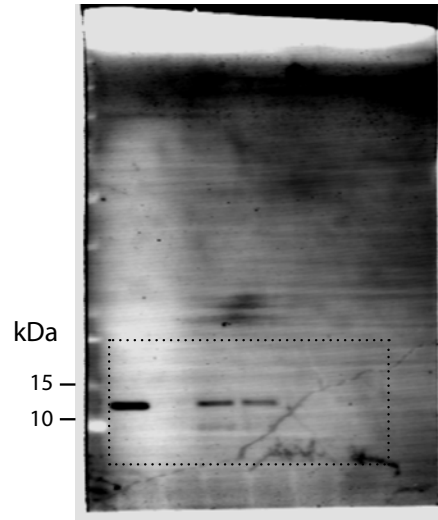

W.B. ubiquitin

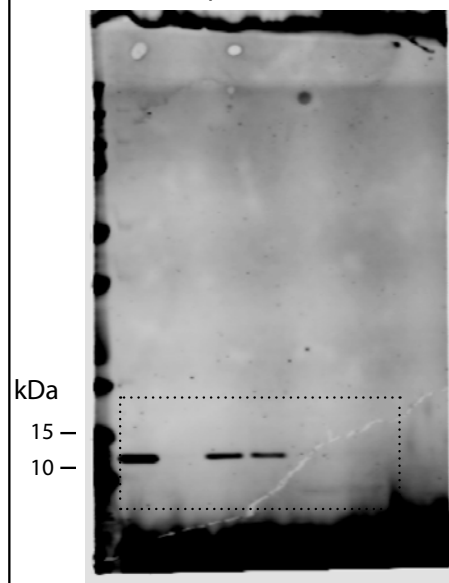

**Supplementary Figure 4.** Source data gels. Original source images for all data obtained by electrophoretic separation: Coomassie stained SDS-PAGE and western blots.

Figure 2A

Coomassie stain

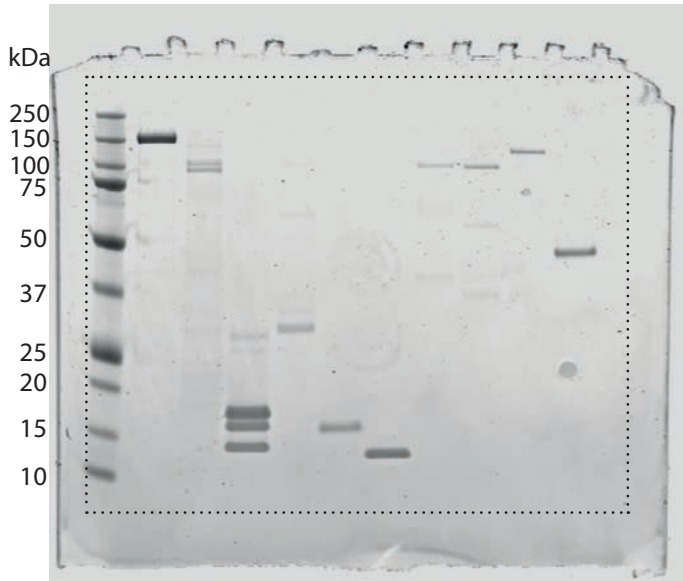

Figure 2C

Coomassie stain

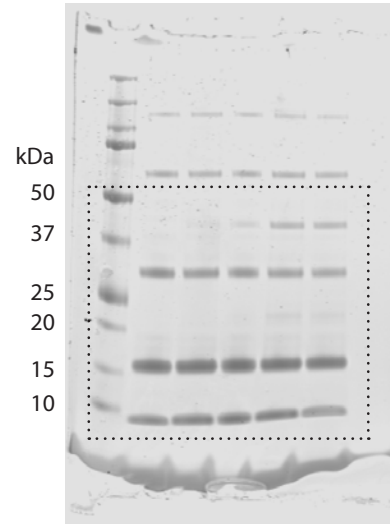

W.B. PCNA

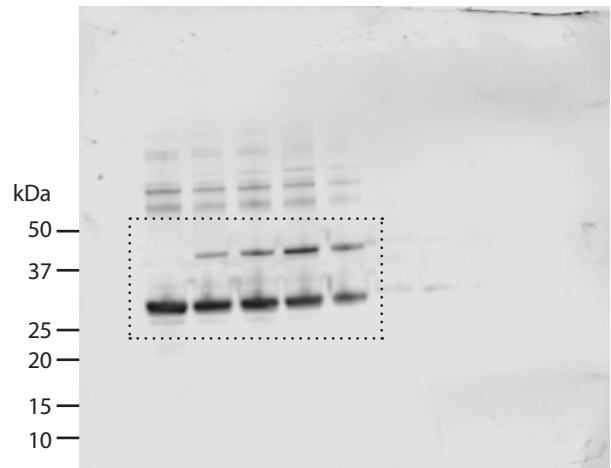

W.B. Streptavidin

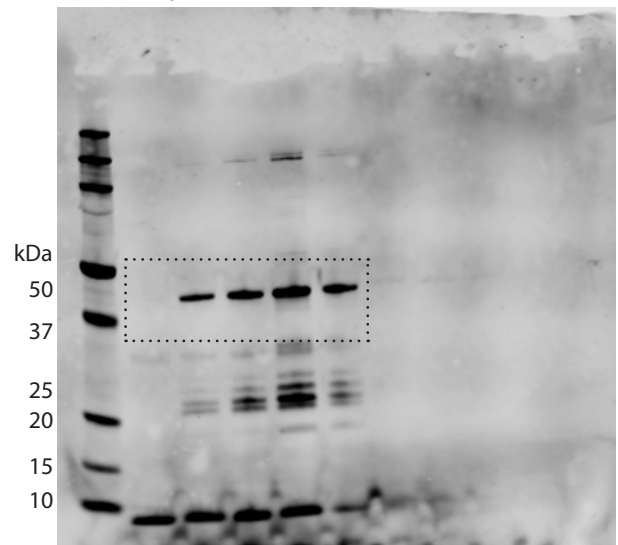

Figure 2B

W.B. Flag

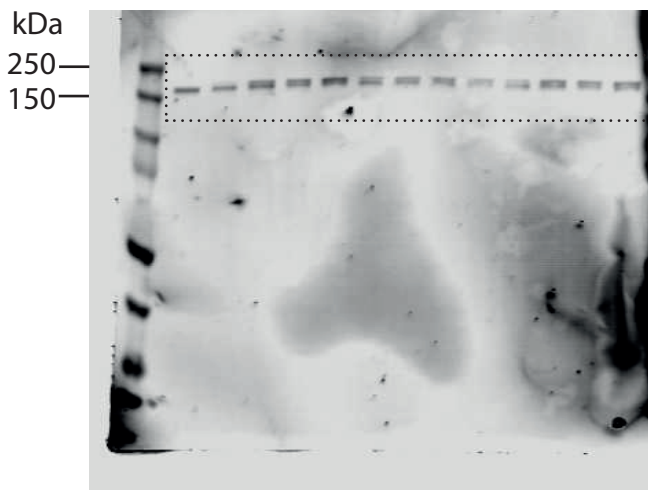

W.B. FANCI

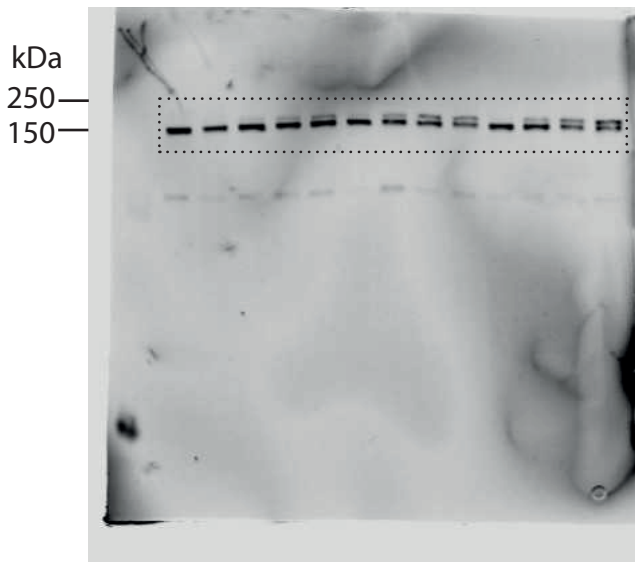

Figure 2D

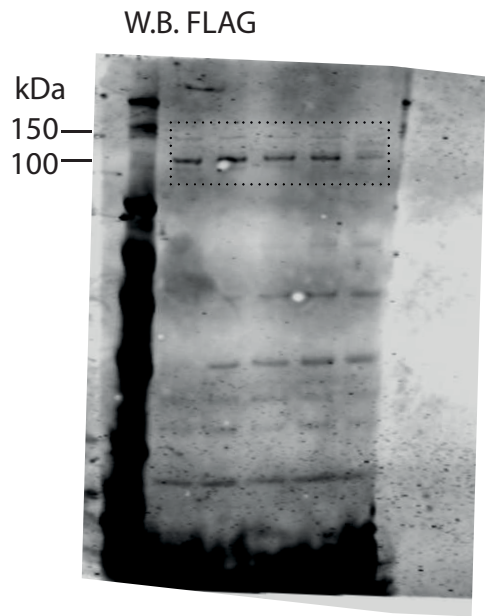

W.B. StreptII

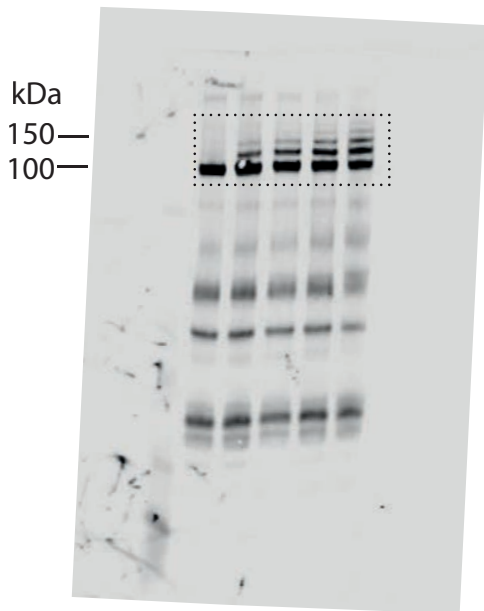

W.B. Streptavidin

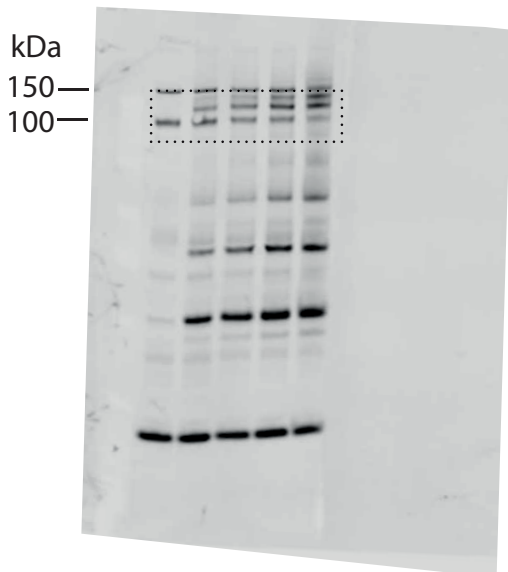

Figure 2E

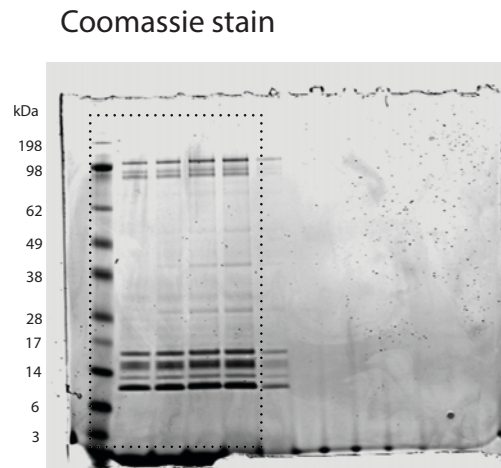

W.B. Streptavidin

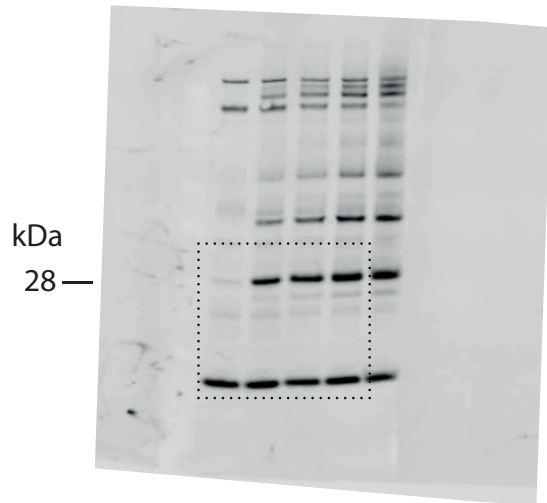

W.B. H2A

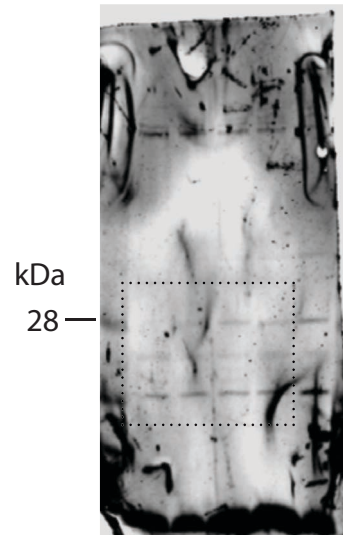

Figure 3A

Coomassie stain

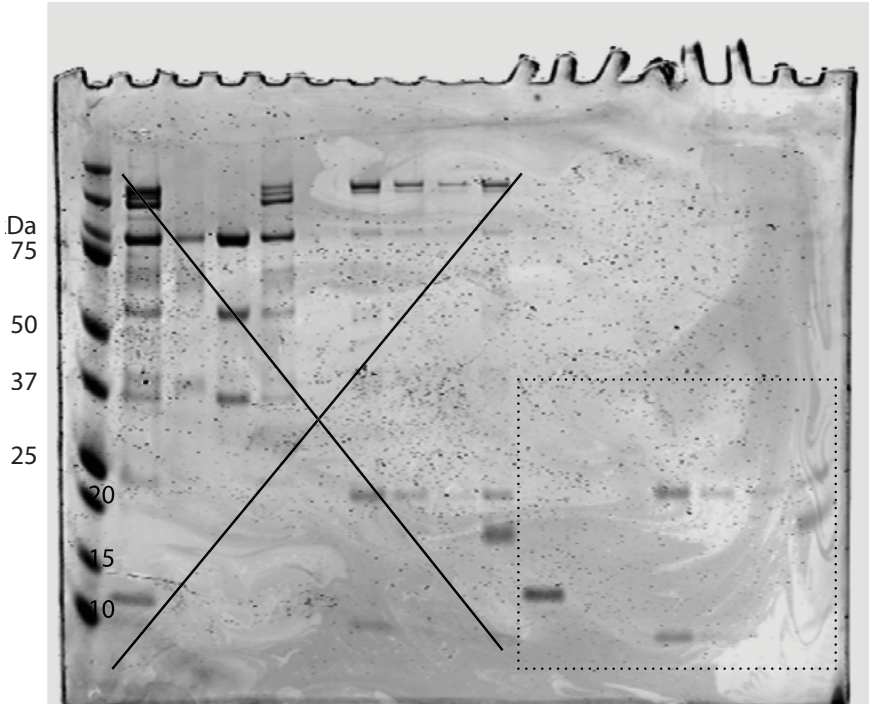

Figure 3C

Coomassie stain

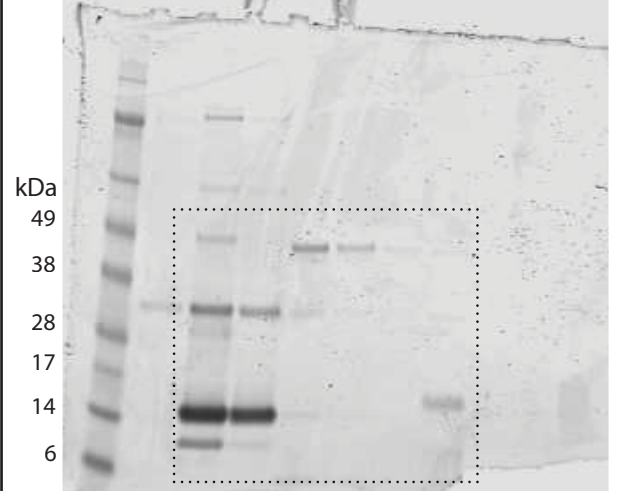

Figure 3B

Coomassie stain

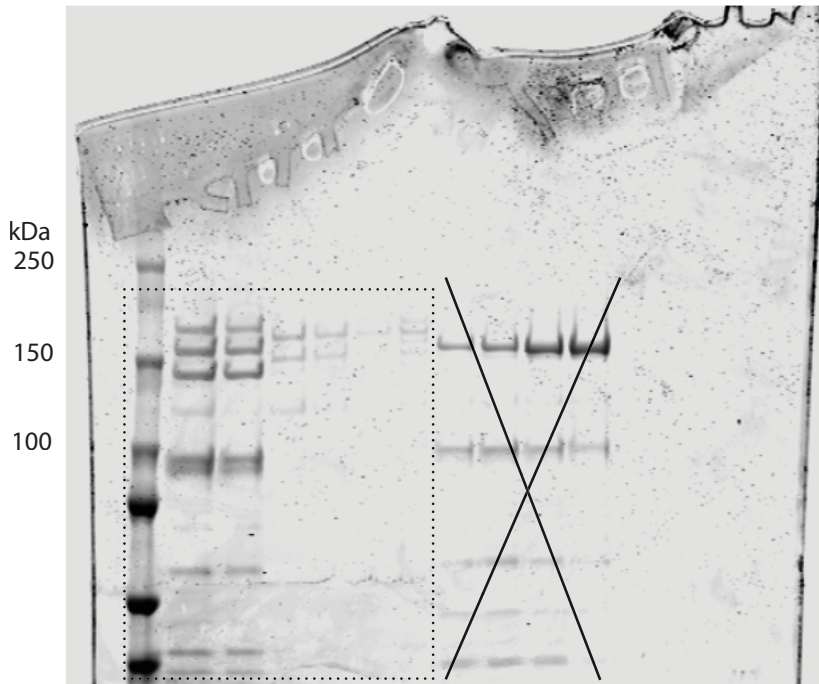

Figure 3D

Silver stain

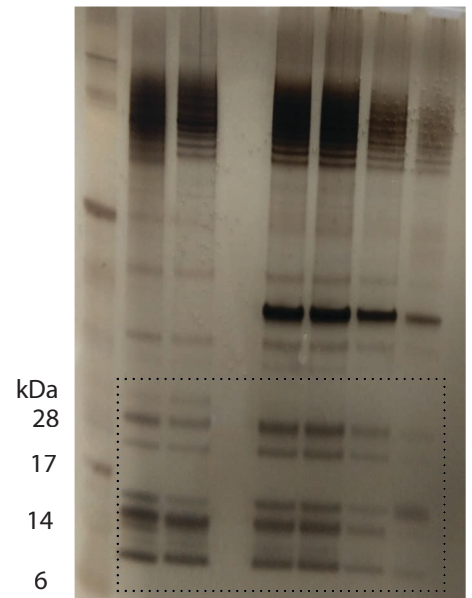

Supp. Figure 1A

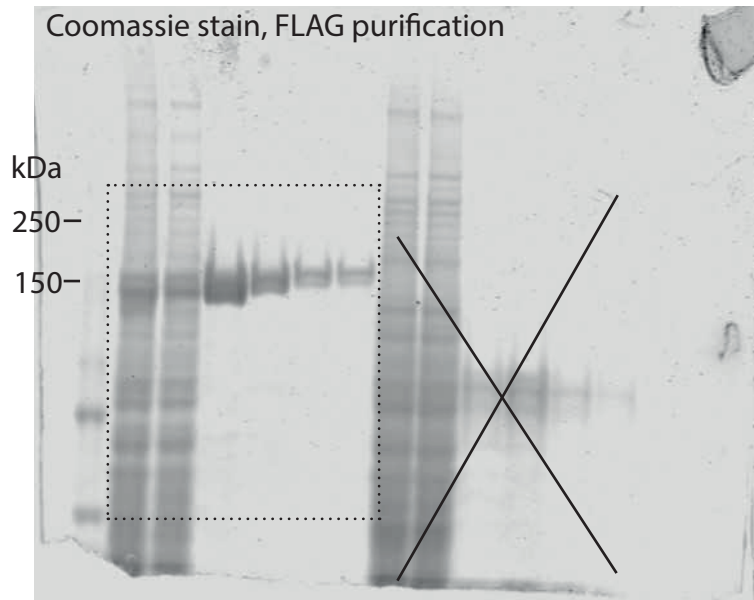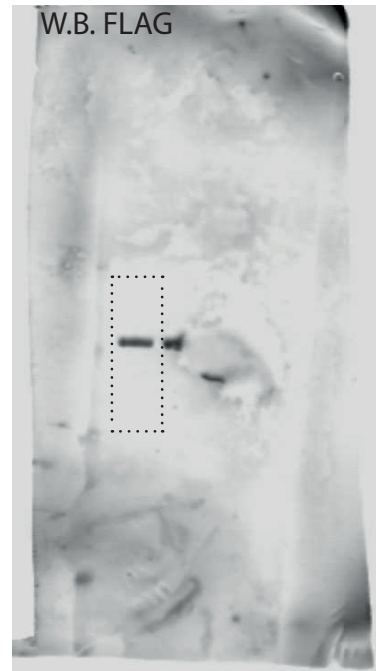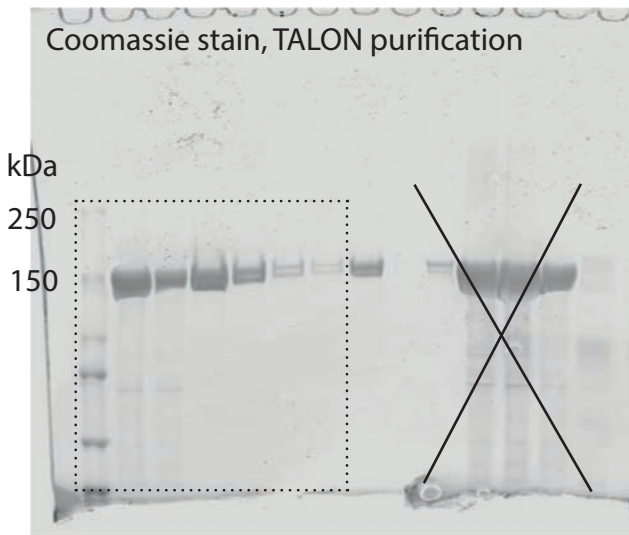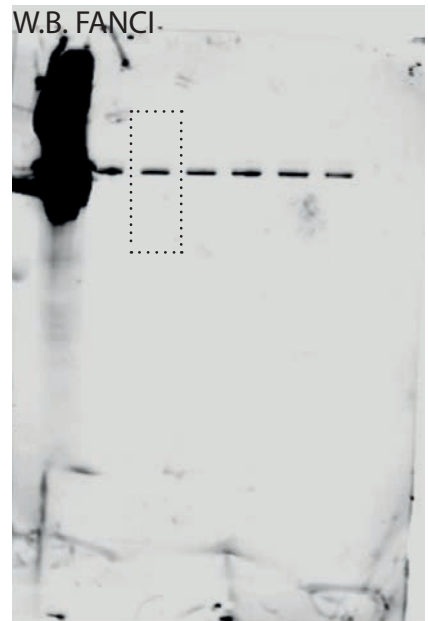

Supp. Figure 1B

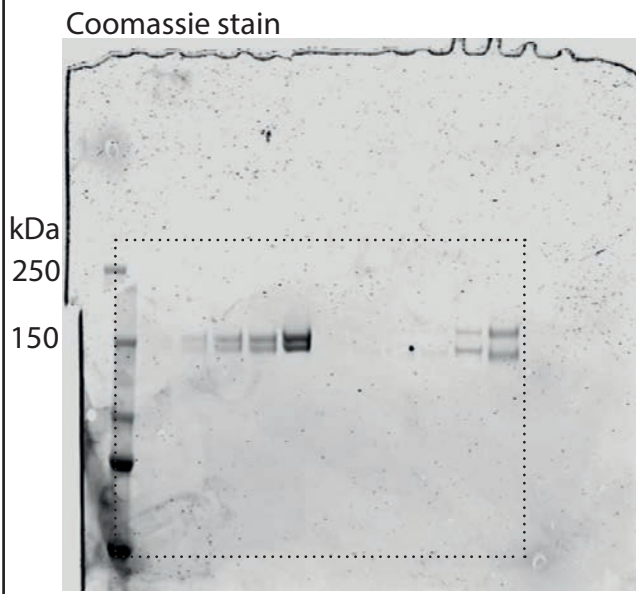

Supp. Figure 1C

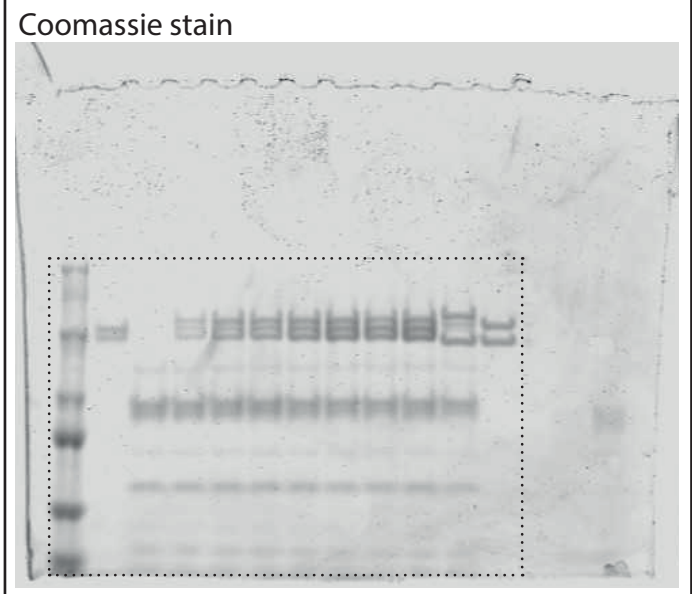

# Supp. Figure 2

## Coomassie stain

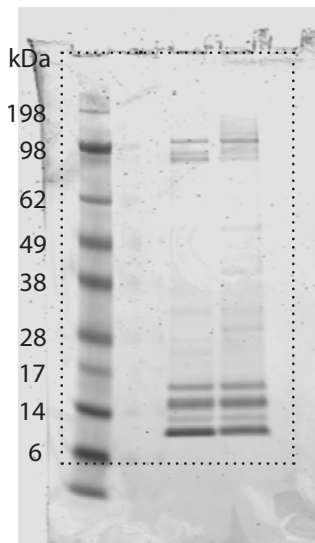

## SYBR Gold stain

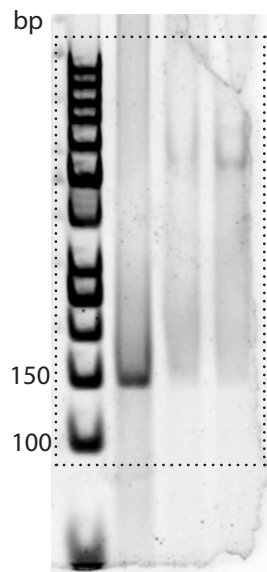

## W.B. Streptavidin

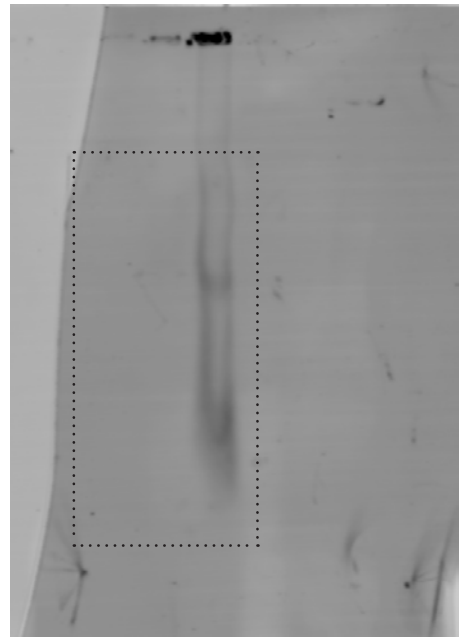

Supplement: pone.0229000.s004.pdf [file pone.0229000.s004.pdf]
