# Supplementary material for: Preparation and purification of mono-ubiquitinated proteins using Avi-tagged ubiquitin
Source: PubMed Central journal article supplement (PMC7039436; doi:10.1371/journal.pone.0229000), 2020-02-24
Supplement: pone.0229000.s002.pdf [file pone.0229000.s002.pdf]

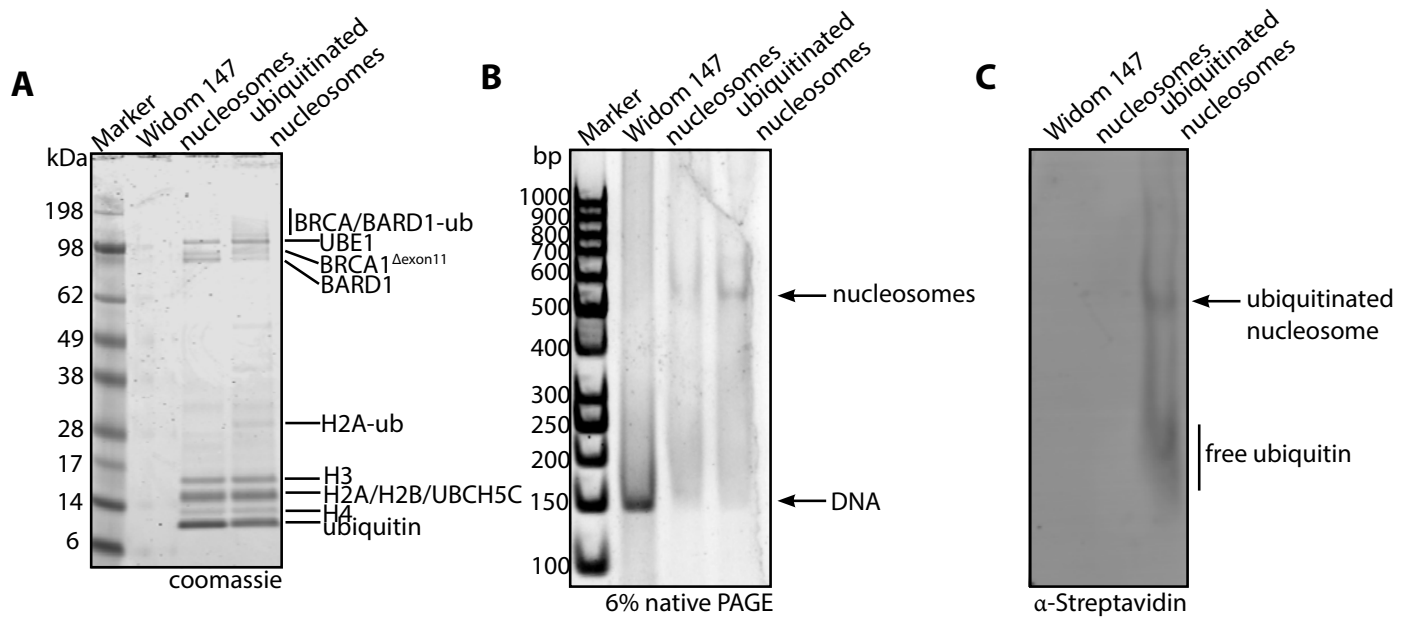

**Supplementary Figure 2. Biochemical reconstitution of mono-ubiquitinated nucleosomes. (A)** Coomassie stained SDS-PAGE showing reconstitution of mono-ubiquitinated nucleosomes. Lane 1 shows 147 bp dsDNA based on Widom 601 sequence in the absence of nucleosome (Widom 147), lane 2 shows mono-ubiquitination reaction containing nucleosomes without ATP (nucleosomes) and lane 3 shows mono-ubiquitination reaction containing nucleosomes, BRCA1<sup>Δexon11</sup>:BARD1 complex, Avi-biotin-ubiquitin, UBE1, UBCH5C and ATP (ubiquitinated nucleosomes). **(B)** 6% native PAGE gel containing the same reactions in (A) stained with SYBR gold nucleic acid stain showing reconstitution of nucleosomes (lanes 2-3). **(C)** Western blot of the 6% PAGE from (B) probed against Streptavidin antibody showing that the reconstituted nucleosomes were ubiquitinated (lane 3).
